# Supplementary material
Source: MDPI journal article supplement (https://www.mdpi.com/2073-4352/12/4/517)
Supplement: s1 [file s1]

# Supplementary Materials: Properties of Sm-Doped SrCl<sub>2</sub> Crystalline Scintillators

Daisuke Nakauchi <sup>1,\*</sup>, Yutaka Fujimoto <sup>2</sup>, Takumi Kato <sup>1</sup>, Noriaki Kawaguchi <sup>1</sup> and Takayuki Yanagida <sup>1</sup>

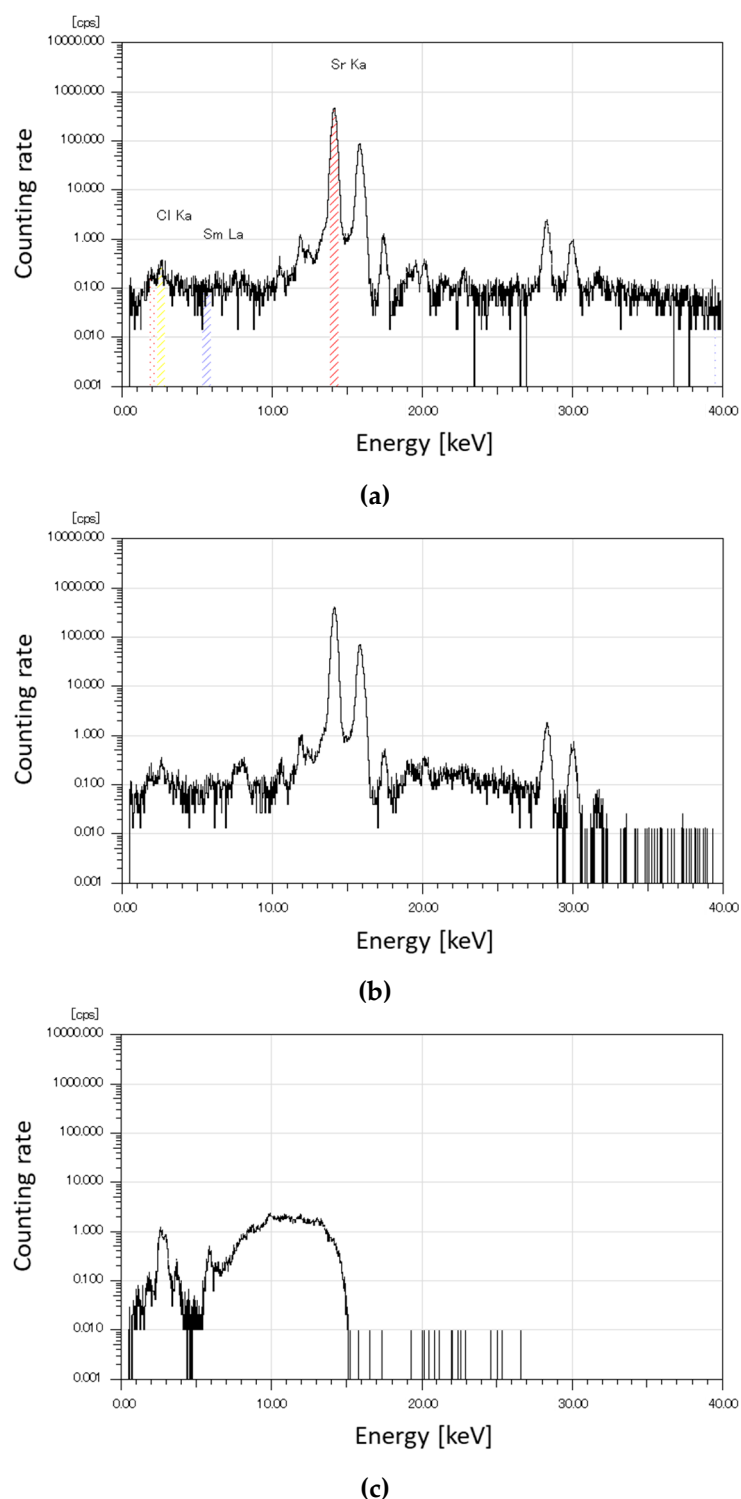

**Figure S1.** X-ray fluorescence spectra of 0.1% Sm:SrCl<sub>2</sub> sample with a tube voltage of (a) 50 kV, (b) 30 kV, and (c) 15 kV.
